# Supplementary material for: Household Food Insecurity, Lung Function, and COPD in US Adults
Source: MDPI journal article supplement (doi:10.3390/nu13062098), 2021-06-19
Supplement: s1 [file s1]

Supplementary File 1: Survey Questions Used by USDA to Assess Household Food Security between 2007-2012 from the National Health and Nutrition Examination Survey

The following questions were used to assess household food security: 1. "We worried whether our food would run out before we got money to buy more." Was that often, sometimes, or never true for you in the last 12 months?; 2. "The food that we bought just didn't last and we didn't have money to get more." Was that often, sometimes, or never true for you in the last 12 months?; 3. "We couldn't afford to eat balanced meals." Was that often, sometimes, or never true for you in the last 12 months?; 4. In the last 12 months, did you or other adults in the household ever cut the size of your meals or skip meals because there wasn't enough money for food? (Yes/No); 5. (If yes to question 4) How often did this happen—almost every month, some months but not every month, or in only 1 or 2 months?; 6. In the last 12 months, did you ever eat less than you felt you should because there wasn't enough money for food? (Yes/No); 7. In the last 12 months, were you ever hungry, but didn't eat, because there wasn't enough money for food? (Yes/No); 8. In the last 12 months, did you lose weight because there wasn't enough money for food? (Yes/No); 9. In the last 12 months did you or other adults in your household ever not eat for a whole day because there wasn't enough money for food? (Yes/No); and 10. (If yes to question 9) How often did this happen—almost every month, some months but not every month, or in only 1 or 2 months?

The households which included children (<18 years) also considered the following questions: 11. "We relied on only a few kinds of low-cost food to feed our children because we were running out of money to buy food." Was that often, sometimes, or never true for you in the last 12 months?; 12. "We couldn't feed our children a balanced meal, because we couldn't afford that." Was that often, sometimes, or never true for you in the last 12 months?; 13. "The children were not eating enough because we just couldn't afford enough food." Was that often, sometimes, or never true for you in the last 12 months?; 14. In the last 12 months, did you ever cut the size of any of the children's meals because there wasn't enough money for food? (Yes/No); 15. In the last 12 months, were the children ever hungry but you just couldn't afford more food? (Yes/No); 16. In the last 12 months, did any of the children ever skip a meal because there wasn't enough money for food? (Yes/No); 17. (If yes to question 16) How often did this happen—almost every month, some months but not every month, or in only 1 or 2 months?; and 18. In the last 12 months did any of the children ever not eat for a whole day because there wasn't enough money for food? (Yes/No).

## References

USDA. Survey Questions Used by USDA to Assess Household Food Security. Available from: <http://www.ers.usda.gov/topics/food-nutrition-assistance/food-security-in-the-us/measurement.aspx>.

**Supplementary Table S1.** Association between respiratory outcomes and Food Insecurity (FI) among Mexican American

| Respiratory outcome                    | Household FI (95% CI)    | p-value |
|----------------------------------------|--------------------------|---------|
| FVC <sup>1</sup> (β)                   |                          |         |
| Model 1                                | 62.0 (-0.33; 124.3)      | 0.058   |
| Model 2                                | 9.69 (-51.7; 71.1)       | 0.759   |
| Model 3                                | 5.11 (-59.97; 70.18)     | 0.879   |
| FEV <sub>1</sub> /FVC <sup>2</sup> (β) |                          |         |
| Model 1                                | -0.005 (-0.009; -0.001)  | 0.021   |
| Model 2                                | -0.005 (-0.009; -0.0005) | 0.036   |
| Model 3                                | -0.003 (-0.007; 0.001)   | 0.146   |

|                                                   |                         |       |
|---------------------------------------------------|-------------------------|-------|
| FVC < LLN <sup>3,4,5</sup> (OR)                   |                         |       |
| Model 1                                           | 1.00 (0.9988; 1.0009)   | 0.327 |
| Model 2                                           | 0.9997 (0.9991; 1.0003) | 0.316 |
| Model 3                                           | 0.9995 (0.0086; 1.0004) | 0.301 |
| FEV <sub>1</sub> /FVC < LLN <sup>3,6,7</sup> (OR) |                         |       |
| Model 1                                           | 1.01 (0.994; 1.02)      | 0.247 |
| Model 2                                           | 1.01 (0.995; 1.02)      | 0.215 |
| Model 3                                           | 1.01 (0.996; 1.02)      | 0.184 |

<sup>1</sup>: n=1,952, <sup>2</sup>: n= 1884; <sup>3</sup>: Only among participants aged ≥ 40 years; <sup>4</sup>: n=1026; <sup>5</sup>: Reference category: FVC ≥ LLN; <sup>6</sup>: n= 992; <sup>7</sup>: Reference category: FEV<sub>1</sub>/FVC ≥ LLN

FVC: Forced Vital Capacity;

FEV<sub>1</sub>: Forced Expiratory Volume in the First Second

FVC < LLN: Spirometric Restriction

FEV<sub>1</sub>/FVC < LLN: Airway obstruction

Model 1: adjusted for age and height

Model 2: additionally adjusted for sex

Model 3: additionally adjusted educational status, annual household income, body mass index and smoking status

**Supplementary Table S2.** Association between respiratory outcomes and Food Insecurity (FI) among Other Hispanic

| Respiratory outcome                               | Household FI (95% CI)  | p-value |
|---------------------------------------------------|------------------------|---------|
| FVC <sup>1</sup> ( $\beta$ )                      |                        |         |
| Model 1                                           | -90.7 (-165; -16.3)    | 0.022   |
| Model 2                                           | -118.3 (-191.6; -45.0) | 0.003   |
| Model 3                                           | -96.5 (-175.8; -17.2)  | 0.023   |
| FEV <sub>1</sub> /FVC <sup>2</sup> ( $\beta$ )    |                        |         |
| Model 1                                           | 0.006 (-0.003; 0.02)   | 0.180   |
| Model 2                                           | 0.006 (-0.003; 0.02)   | 0.174   |
| Model 3                                           | 0.009 (0.0003; 0.02)   | 0.051   |
| FVC < LLN <sup>3,4,5</sup> (OR)                   |                        |         |
| Model 1                                           | 1.01 (0.997; 1.023)    | 0.143   |
| Model 2                                           | 1.01 (0.997; 1.023)    | 0.146   |
| Model 3                                           | 1.01 (0.996; 1.024)    | 0.160   |
| FEV <sub>1</sub> /FVC < LLN <sup>3,6,7</sup> (OR) |                        |         |
| Model 1                                           | 0.99 (0.97; 1.01)      | 0.470   |
| Model 2                                           | 0.99 (0.97; 1.01)      | 0.467   |
| Model 3                                           | 0.98 (0.96; 1.01)      | 0.195   |

<sup>1</sup>: n=1,259; <sup>2</sup>: n= 1227; <sup>3</sup>: Only among participants aged  $\geq 40$  years; <sup>4</sup>: n=740; <sup>5</sup>: Reference category: FVC $\geq$ LLN; <sup>6</sup>: n= 718; <sup>7</sup>: Reference category: FEV<sub>1</sub>/FVC $\geq$ LLN

FVC: Forced Vital Capacity

FEV<sub>1</sub>: Forced Expiratory Volume in the First Second

FVC < LLN: Spirometric Restriction

FEV<sub>1</sub>/FVC < LLN: Airway obstruction

Model 1: adjusted for age and height

Model 2: additionally adjusted for sex

Model 3: additionally adjusted educational status, annual household income, body mass index and smoking status

**Supplementary Table S3.** Association between respiratory outcomes and Food Insecurity (FI) among non-Hispanic white

| Respiratory outcome                             | Household FI (95% CI)  | p-value |
|-------------------------------------------------|------------------------|---------|
| FVC <sup>1</sup> ( $\beta$ )                    |                        |         |
| Model 1                                         | -77.4 (-129.9; -24.9)  | 0.006   |
| Model 2                                         | -109.4 (-165.4; -53.4) | <0.001  |
| Model 3                                         | -44.0 (-109.3; 21.4)   | 0.194   |
| FEV <sub>1</sub> /FVC <sup>2</sup> ( $\beta$ )  |                        |         |
| Model 1                                         | -0.02 (-0.03; -0.008)  | 0.002   |
| Model 2                                         | -0.02 (-0.03; -0.007)  | 0.003   |
| Model 3                                         | -0.008 (-0.02; 0.004)  | 0.207   |
| FVC <LLN <sup>3,4,5</sup> (OR)                  |                        |         |
| Model 1                                         | 1.01 (0.997; 1.02)     | 0.175   |
| Model 2                                         | 1.01 (0.997; 1.02)     | 0.148   |
| Model 3                                         | 1.00 (0.989; 1.01)     | 0.882   |
| FEV <sub>1</sub> /FVC<LLN <sup>3,6,7</sup> (OR) |                        |         |
| Model 1                                         | 1.06 (0.98; 1.15)      | 0.151   |
| Model 2                                         | 1.06 (0.98; 1.15)      | 0.152   |
| Model 3                                         | 1.03 (0.95; 1.12)      | 0.507   |

<sup>1</sup>: n=5,216; <sup>2</sup>: n= 5111; <sup>3</sup>: Only among participants aged  $\geq 40$  years; <sup>4</sup>: n=3191; <sup>5</sup>: Reference category: FVC $\geq$ LLN; <sup>6</sup>: n= 3132; <sup>7</sup>: Reference category: FEV<sub>1</sub>/FVC $\geq$ LLN

FVC: Forced Vital Capacity

FEV<sub>1</sub>: Forced Expiratory Volume in the First Second

FVC < LLN: Spirometric Restriction

FEV<sub>1</sub>/FVC < LLN: Airway obstruction

Model 1: adjusted for age and height

Model 2: additionally adjusted for sex

Model 3: additionally adjusted educational status, annual household income, body mass index and smoking status

**Supplementary Table S4.** Association between respiratory outcomes and Food Insecurity (FI) among non-Hispanic black

| Respiratory outcome                             | Household FI (95% CI)   | p-value |
|-------------------------------------------------|-------------------------|---------|
| FVC <sup>1</sup> ( $\beta$ )                    |                         |         |
| Model 1                                         | -71.5 (-136.1;-6.89)    | 0.036   |
| Model 2                                         | -64.9 (-123.4; -6.42)   | 0.356   |
| Model 3                                         | -58.3 (-120.7; 4.02)    | 0.075   |
| FEV <sub>1</sub> /FVC <sup>2</sup> ( $\beta$ )  |                         |         |
| Model 1                                         | -0.007 (-0.01; 0.0006)  | 0.081   |
| Model 2                                         | -0.006 (-0.01; 0.0006)  | 0.078   |
| Model 3                                         | -0.0008 (-0.009; 0.007) | 0.838   |
| FVC <LLN <sup>3,4,5</sup> (OR)                  |                         |         |
| Model 1                                         | 1.05 (1.01; 1.10)       | 0.029   |
| Model 2                                         | 1.05 (1.01; 1.10)       | 0.030   |
| Model 3                                         | 1.06 (1.01; 1.11)       | 0.023   |
| FEV <sub>1</sub> /FVC<LLN <sup>3,6,7</sup> (OR) |                         |         |
| Model 1                                         | 1.00 (0.97; 1.03)       | 0.894   |
| Model 2                                         | 1.00 (0.97; 1.03)       | 0.893   |
| Model 3                                         | 1.00 (0.96; 1.04)       | 0.990   |

<sup>1</sup>: n=2,447; <sup>2</sup>: n= 2374; <sup>3</sup>: Only among participants aged  $\geq 40$  years; <sup>4</sup>: n=1446; <sup>5</sup>: Reference category: FVC $\geq$ LLN; <sup>6</sup>: n= 1408; <sup>7</sup>: Reference category: FEV<sub>1</sub>/FVC $\geq$ LLN

FVC: Forced Vital Capacity

FEV<sub>1</sub>: Forced Expiratory Volume in the First Second

FVC < LLN: Spirometric Restriction

FEV<sub>1</sub>/FVC < LLN: Airway obstruction

Model 1: adjusted for age and height

Model 2: additionally adjusted for sex

Model 3: additionally adjusted educational status, annual household income, body mass index and smoking status

**Supplementary Table S5.** Association between respiratory outcomes and Food Insecurity (FI) among other non-Hispanic

| Respiratory outcome                               | Household FI (95% CI) | p-value |
|---------------------------------------------------|-----------------------|---------|
| FVC <sup>1</sup> ( $\beta$ )                      |                       |         |
| Model 1                                           | 26.2 (-100.6; 153.1)  | 0.687   |
| Model 2                                           | 32.2 (-90.9; 155.3)   | 0.611   |
| Model 3                                           | 20.9 (-89.6; 131.44)  | 0.713   |
| FEV <sub>1</sub> /FVC <sup>2</sup> ( $\beta$ )    |                       |         |
| Model 1                                           | -0.002 (-0.02; 0.01)  | 0.761   |
| Model 2                                           | -0.002 (-0.02; 0.01)  | 0.763   |
| Model 3                                           | 0.006 (-0.01; 0.02)   | 0.362   |
| FVC < LLN <sup>3,4,5</sup> (OR)                   |                       |         |
| Model 1                                           | 0.998 (0.972; 1.025)  | 0.874   |
| Model 2                                           | 0.998 (0.973; 1.025)  | 0.913   |
| Model 3                                           | 1.00 (0.98; 1.022)    | 0.930   |
| FEV <sub>1</sub> /FVC < LLN <sup>3,6,7</sup> (OR) |                       |         |
| Model 1                                           | 0.96 (0.94; 0.99)     | 0.016   |
| Model 2                                           | 0.96 (0.94; 0.99)     | 0.017   |
| Model 3                                           | 0.96 (0.92; 0.99)     | 0.047   |

<sup>1</sup>: n=943; <sup>2</sup>: n= 927; <sup>3</sup>: Only among participants aged  $\geq 40$  years; <sup>4</sup>: n=455; <sup>5</sup>: Reference category: FVC $\geq$ LLN; <sup>6</sup>: n= 445; <sup>7</sup>: Reference category: FEV<sub>1</sub>/FVC $\geq$ LLN

FVC: Forced Vital Capacity

FEV<sub>1</sub>: Forced Expiratory Volume in the First Second

FVC < LLN: Spirometric Restriction

FEV<sub>1</sub>/FVC < LLN: Airway obstruction

Model 1: adjusted for age and height

Model 2: additionally adjusted for sex

Model 3: additionally adjusted educational status, annual household income, body mass index and smoking status
